# Supplementary material
Source: PubMed Central journal article supplement (PMC7153546)

## **SUPPLEMENTAL MATERIAL**

### *Cost Analyses*

Cost estimates were derived from three primary sources: 1) the Premier Research Database for index diagnostic testing, 2) hospital billing data for hospital costs, and 3) Current Procedural Terminology or Healthcare Common Procedure Coding System codes in the 2014 Medicare national reimbursement schedule for physician costs. Total costs (fixed plus variable) were discounted at a 3% annual rate and adjusted to 2014 U.S. dollars using the Producer Price Index for hospital care. A repeated measures, mixed model was used to assess the association between inconclusive test results and costs over the first 24 months after randomization. A random intercept was included for each subject to account for clustering in the data. Time points for repeated measures were every 3 months. A multivariable repeated measures regression model was fitted to assess the association between inconclusive test results and costs over the first 24 months from randomization after adjusting for key characteristics. The linearity assumption was used for all continuous adjustment variables, and an appropriate nonlinear form was used in cases where the assumption did not hold. The mean cost (95% CI) for inconclusive and negative conclusive tests was presented by quarter. The mean difference between inconclusive and negative conclusive test results (95% CI) and p-value were presented for the unadjusted and adjusted regression models.

**Table I: Association between NIT Modality and NIT Inconclusiveness in Intention-to-Treat Population**

| Comparison     | Frequency of Inconclusiveness<br>(# Events/Sample Size) |                  | Unadjusted*         |         | Adjusted†           |         |
|----------------|---------------------------------------------------------|------------------|---------------------|---------|---------------------|---------|
|                | Stress Test                                             | CTA              | Odds Ratio (95% CI) | P-value | Odds Ratio (95% CI) | P-value |
| Stress vs. CTA | 458/4718 (9.71%)                                        | 316/4821 (6.55%) | 1.53 (1.32-1.78)    | <0.001  | 1.53 (1.32-1.79)    | <0.001  |

NIT = noninvasive test, CTA = computed tomographic angiogram

\* Unadjusted model contains NIT modality (stress test vs. CTA).

† Adjusted model contains NIT modality (stress test vs. CTA), age, sex, BMI, diabetes, smoker (ever/never), CAD equivalent, site characterization of chest pain, provider estimation of likelihood of obstructive epicardial disease (high or very high), hypertension, dyslipidemia, family history of premature CAD, participate in physical activity, Framingham Risk Score (2008), Diamond-Forrester (2011) score.

**Table II: Association between NIT Type and NIT Inconclusiveness in Intention-to-Treat Population**

| Comparison             | Frequency of Inconclusiveness<br>(# Events/Sample Size) |                  | Unadjusted*         |         | Adjusted†           |         |
|------------------------|---------------------------------------------------------|------------------|---------------------|---------|---------------------|---------|
|                        | Stress Test                                             | CTA              | Odds Ratio (95% CI) | P-value | Odds Ratio (95% CI) | P-value |
| Stress Nuclear vs. CTA | 229/3197 (7.16%)                                        | 316/4821 (6.55%) | 1.10 (0.92-1.31)    | 0.289   | 1.07 (0.90-1.29)    | 0.429   |
| Stress Echo vs. CTA    | 121/1049 (11.53%)                                       | 316/4821 (6.55%) | 1.86 (1.49-2.32)    | <0.001  | 1.98 (1.58-2.48)    | <0.001  |
| Exercise ECG vs. CTA   | 108/472 (22.88%)                                        | 316/4821 (6.55%) | 4.23 (3.32-5.39)    | <0.001  | 4.42 (3.43-5.68)    | <0.001  |

NIT = noninvasive test, CTA = computed tomographic angiogram, ECG = electrocardiogram

\* Unadjusted model contains NIT test type (stress nuclear, stress echo, exercise ECG vs. CTA).

† Adjusted model contains NIT test type (stress nuclear, stress echo, exercise ECG vs. CTA), age, sex, BMI, diabetes, smoker (ever/never), CAD equivalent, site characterization of chest pain, provider estimation of likelihood of obstructive epicardial disease (high or very high), hypertension, dyslipidemia, family history of premature CAD, participate in physical activity, Framingham Risk Score (2008), Diamond-Forrester (2011) score.

**Table III: Association between Stress Test Type and NIT Inconclusiveness**

| <b>Comparison</b>               | <b>Frequency of Inconclusiveness<br/>(# Events/Sample Size)</b> |                     | <b>Unadjusted*</b>         |                | <b>Adjusted†</b>           |                |
|---------------------------------|-----------------------------------------------------------------|---------------------|----------------------------|----------------|----------------------------|----------------|
|                                 | <b>Imaging Stress Test</b>                                      | <b>Exercise ECG</b> | <b>Odds Ratio (95% CI)</b> | <b>P-value</b> | <b>Odds Ratio (95% CI)</b> | <b>P-value</b> |
| Stress Nuclear vs. Exercise ECG | 215/3096 (6.94%)                                                | 104/438 (23.74%)    | 0.24 (0.18-0.31)           | <0.001         | 0.23 (0.17-0.30)           | <0.001         |
| Stress Echo vs. Exercise ECG    | 119/999 (11.91%)                                                | 104/438 (23.74%)    | 0.43 (0.32-0.58)           | <0.001         | 0.44 (0.32-0.59)           | <0.001         |

NIT = noninvasive test, ECG = electrocardiogram

\* Unadjusted model contains stress test type (stress nuclear, stress echo vs. exercise ECG).

† Adjusted model contains stress test type (stress nuclear, stress echo, vs. exercise ECG), age, sex, body mass index (BMI), diabetes, smoker (ever/never), coronary artery disease (CAD) equivalent, site characterization of chest pain, provider estimation of likelihood of obstructive epicardial disease (high or very high), hypertension, dyslipidemia, family history of premature CAD, participate in physical activity, Framingham Risk Score (2008), Diamond-Forrester (2011) score.

**Table IV: Association between Inconclusive Test Results and Process of Care by Stress Test Type**

| Process of Care/Outcome                            | Frequency of Event<br>(# Events/Sample Size) |                     | Unadjusted            |         | Adjusted*             |         |
|----------------------------------------------------|----------------------------------------------|---------------------|-----------------------|---------|-----------------------|---------|
|                                                    | Inconclusive or<br>Conclusive Positive       | Conclusive Negative | Odds Ratio (95% CI)   | P-value | Odds Ratio (95% CI)   | P-value |
| <b>Exercise ECG</b>                                |                                              |                     |                       |         |                       |         |
| Referral to 2nd NIT within 90 Days of 1st NIT      |                                              |                     |                       |         |                       |         |
| Conclusive Positive vs. Conclusive Negative        | 23/54 (42.6%)                                | 28/280 (10.0%)      | 6.68 (3.42-13.02)     | <0.001  | 5.99 (2.96-12.14)     | <0.001  |
| Inconclusive vs. Conclusive Negative               | 23/104 (22.1%)                               | 28/280 (10.0%)      | 2.56 (1.39-4.69)      | 0.003   | 2.46 (1.30-4.64)      | 0.006   |
| Referral to ICA within 90 Days of<br>Randomization |                                              |                     |                       |         |                       |         |
| Conclusive Positive vs. Conclusive Negative        | 16/54 (29.6%)                                | 2/280 (0.7%)        | 58.53 (12.89-265.67)  | <0.001  | 99.49 (16.35-605.50)  | <0.001  |
| Inconclusive vs. Conclusive Negative               | 3/104 (2.9%)                                 | 2/280 (0.7%)        | 4.13 (0.68-25.19)     | 0.124   | 3.62 (0.50-26.43)     | 0.203   |
| <b>Stress Echo</b>                                 |                                              |                     |                       |         |                       |         |
| Referral to 2nd NIT within 90 Days of 1st NIT      |                                              |                     |                       |         |                       |         |
| Conclusive Positive vs. Conclusive Negative        | 19/75 (25.3%)                                | 53/805 (6.6%)       | 4.81 (2.67-8.69)      | <0.001  | 4.79 (2.56-8.97)      | <0.001  |
| Inconclusive vs. Conclusive Negative               | 15/119 (12.6%)                               | 53/805 (6.6%)       | 2.05 (1.11-3.76)      | 0.021   | 1.98 (1.04-3.79)      | 0.039   |
| Referral to ICA within 90 Days of<br>Randomization |                                              |                     |                       |         |                       |         |
| Conclusive Positive vs. Conclusive Negative        | 44/75 (58.7%)                                | 10/805 (1.2%)       | 112.84 (51.95-245.09) | <0.001  | 121.17 (51.53-284.91) | <0.001  |
| Inconclusive vs. Conclusive Negative               | 6/119 (5.0%)                                 | 10/805 (1.2%)       | 4.22 (1.50-11.85)     | 0.006   | 4.02 (1.33-12.13)     | 0.014   |
| <b>Stress Nuclear</b>                              |                                              |                     |                       |         |                       |         |
| Referral to 2nd NIT within 90 Days of 1st NIT      |                                              |                     |                       |         |                       |         |
| Conclusive Positive vs. Conclusive Negative        | 103/435 (23.7%)                              | 218/2446 (8.9%)     | 3.17 (2.44-4.12)      | <0.001  | 3.06 (2.33-4.02)      | <0.001  |
| Inconclusive vs. Conclusive Negative               | 26/215 (12.1%)                               | 218/2446 (8.9%)     | 1.41 (0.91-2.17)      | 0.123   | 1.48 (0.96-2.29)      | 0.079   |
| Referral to ICA within 90 Days of<br>Randomization |                                              |                     |                       |         |                       |         |
| Conclusive Positive vs. Conclusive Negative        | 203/435 (46.7%)                              | 73/2446 (3.0%)      | 28.44 (21.08-38.38)   | <0.001  | 27.83 (20.30-38.14)   | <0.001  |

**Table IV: Association between Inconclusive Test Results and Process of Care by Stress Test Type**

| Process of Care/Outcome              | Frequency of Event<br>(# Events/Sample Size) |                     | Unadjusted          |         | Adjusted*           |         |
|--------------------------------------|----------------------------------------------|---------------------|---------------------|---------|---------------------|---------|
|                                      | Inconclusive or<br>Conclusive Positive       | Conclusive Negative | Odds Ratio (95% CI) | P-value | Odds Ratio (95% CI) | P-value |
| Inconclusive vs. Conclusive Negative | 15/215 (7.0%)                                | 73/2446 (3.0%)      | 2.44 (1.37-4.33)    | 0.002   | 2.47 (1.38-4.43)    | 0.002   |

NIT = noninvasive test, ICA = invasive coronary angiogram

\* Adjustment variables include age, sex, race, ethnicity, body mass index, hypertension, diabetes, dyslipidemia, smoking (ever), depression, participate in physical activity, family history of CAD, peripheral arterial disease or cerebrovascular disease, and site characterization of chest pain

**Table V: Association between Inconclusive Test Results and Outcomes by Stress Test Type**

| Process of Care/Outcome                     | Frequency of Event<br>(# Events/Sample Size) |                | Unadjusted            |         | Adjusted*             |         |
|---------------------------------------------|----------------------------------------------|----------------|-----------------------|---------|-----------------------|---------|
|                                             | Inconclusive                                 | Conclusive     | Hazard Ratio (95% CI) | P-value | Hazard Ratio (95% CI) | P-value |
| <b>Exercise ECG<sup>†</sup></b>             |                                              |                |                       |         |                       |         |
| All-Cause Death/MI/UAH                      |                                              |                |                       |         |                       |         |
| Conclusive Positive vs. Conclusive Negative | 1/54 (1.9%)                                  | 2/280 (0.7%)   |                       |         |                       |         |
| Inconclusive vs. Conclusive Negative        | 2/104 (1.9%)                                 | 2/280 (0.7%)   |                       |         |                       |         |
| CV Death/MI                                 |                                              |                |                       |         |                       |         |
| Conclusive Positive vs. Conclusive Negative | 0/54 (0.0%)                                  | 1/280 (0.4%)   |                       |         |                       |         |
| Inconclusive vs. Conclusive Negative        | 1/104 (1.0%)                                 | 1/280 (0.4%)   |                       |         |                       |         |
| <b>Stress Echo</b>                          |                                              |                |                       |         |                       |         |
| All-Cause Death/MI/UAH                      |                                              |                |                       |         |                       |         |
| Conclusive Positive vs. Conclusive Negative | 4/75 (5.3%)                                  | 13/805 (1.6%)  | 3.21 (1.05-9.86)      | 0.041   | 2.08 (0.63-6.89)      | 0.228   |
| Inconclusive vs. Conclusive Negative        | 5/119 (4.2%)                                 | 13/805 (1.6%)  | 2.66 (0.95-7.46)      | 0.063   | 1.93 (0.63-5.93)      | 0.248   |
| CV Death/MI                                 |                                              |                |                       |         |                       |         |
| Conclusive Positive vs. Conclusive Negative | 2/75 (2.7%)                                  | 5/805 (0.6%)   | 3.93 (0.76-20.29)     | 0.102   | 3.59 (0.57-22.42)     | 0.172   |
| Inconclusive vs. Conclusive Negative        | 2/119 (1.7%)                                 | 5/805 (0.6%)   | 2.79 (0.54-14.40)     | 0.220   | 1.71 (0.23-12.55)     | 0.600   |
| <b>Stress Nuclear</b>                       |                                              |                |                       |         |                       |         |
| All-Cause Death/MI/UAH                      |                                              |                |                       |         |                       |         |
| Conclusive Positive vs. Conclusive Negative | 42/435 (9.7%)                                | 54/2446 (2.2%) | 4.62 (3.09-6.92)      | <0.001  | 3.84 (2.52-5.83)      | <0.001  |
| Inconclusive vs. Conclusive Negative        | 9/215 (4.2%)                                 | 54/2446 (2.2%) | 1.89 (0.93-3.83)      | 0.077   | 1.77 (0.87-3.60)      | 0.113   |
| CV Death/MI                                 |                                              |                |                       |         |                       |         |
| Conclusive Positive vs. Conclusive Negative | 17/435 (3.9%)                                | 37/2446 (1.5%) | 2.58 (1.45-4.58)      | 0.001   | 1.98 (1.09-3.62)      | 0.026   |

**Table V: Association between Inconclusive Test Results and Outcomes by Stress Test Type**

| Process of Care/Outcome              | Frequency of Event<br>(# Events/Sample Size) |                | Unadjusted            |         | Adjusted*             |         |
|--------------------------------------|----------------------------------------------|----------------|-----------------------|---------|-----------------------|---------|
|                                      | Inconclusive                                 | Conclusive     | Hazard Ratio (95% CI) | P-value | Hazard Ratio (95% CI) | P-value |
| Inconclusive vs. Conclusive Negative | 8/215 (3.7%)                                 | 37/2446 (1.5%) | 2.43 (1.13-5.21)      | 0.023   | 2.36 (1.09-5.09)      | 0.029   |

ECG = electrocardiogram, MI = myocardial infarction, UAH = unstable angina hospitalization

\* Adjustment variables include age, sex, race, ethnicity, body mass index, hypertension, diabetes, dyslipidemia, smoking (ever), depression, participate in physical activity, family history of CAD, peripheral arterial disease or cerebrovascular disease, and site characterization of chest pain

† The number of events in the exercise ECG group are too low to get an accurate hazards ratio.

| <b>Table VI: Pretest/Provider Assessment and Characteristics Among Inconclusive Test Results that Did or Did Not Lead to Additional Testing</b> |                          |              |                |
|-------------------------------------------------------------------------------------------------------------------------------------------------|--------------------------|--------------|----------------|
|                                                                                                                                                 | <b>Second NIT or ICA</b> |              |                |
| <b>Characteristic</b>                                                                                                                           | <b>Yes</b>               | <b>No</b>    | <b>P-value</b> |
| N                                                                                                                                               | 240                      | 496          |                |
| ASCVD (2013)                                                                                                                                    | 20.3 (13.47)             | 15.5 (12.24) | <0.001         |
| Framingham Risk Score (2008)                                                                                                                    | 29.0 (16.98)             | 23.5 (16.71) | <0.001         |
| Provider characteristic of chest pain cardiac                                                                                                   |                          |              | 0.570          |
| Non-cardiac                                                                                                                                     | 26 (10.8%)               | 61 (12.3%)   |                |
| Typical/Atypical                                                                                                                                | 214 (89.2%)              | 436 (87.7%)  |                |
| Provider assessment of significant epicardial coronary stenosis or left main stenosis                                                           |                          |              | <0.001         |
| Very Low/Low (<30%)                                                                                                                             | 79 (32.9%)               | 191 (38.4%)  |                |
| Intermediate (31-70%)                                                                                                                           | 130 (54.2%)              | 284 (57.1%)  |                |
| High/Very High (≥70%)                                                                                                                           | 31 (12.9%)               | 22 (4.4%)    |                |
| ASCVD = atherosclerotic cardiovascular disease                                                                                                  |                          |              |                |



| <b>Table VII: Association between Inconclusive Test Results from Initial NIT and Total Medical Costs for Overall Stress and CTA</b> |                                                                   |                            |                                            |                |                                            |                |
|-------------------------------------------------------------------------------------------------------------------------------------|-------------------------------------------------------------------|----------------------------|--------------------------------------------|----------------|--------------------------------------------|----------------|
|                                                                                                                                     | <b>Total Medical Costs (\$, Cumulative)<br/>LS Means (95% CI)</b> |                            | <b>Unadjusted Difference in Costs (\$)</b> |                | <b>Adjusted Difference in Costs (\$) *</b> |                |
| <b>Time from Randomization</b>                                                                                                      | <b>Comparison Group</b>                                           | <b>Conclusive Negative</b> | <b>Difference (95% CI)</b>                 | <b>P-value</b> | <b>Difference (95% CI)</b>                 | <b>P-value</b> |
| <b>Conclusive Positive vs. Conclusive Negative</b>                                                                                  |                                                                   |                            |                                            |                |                                            |                |
| <i>CTA</i>                                                                                                                          |                                                                   |                            |                                            |                |                                            |                |
| 3 Months                                                                                                                            | 10932 (10350-11513)                                               | 1175 (957-1393)            | 9757 (9136-10378)                          | <0.001         | 9052 (8240-9864)                           | <0.001         |
| 6 Months                                                                                                                            | 12797 (12102-13492)                                               | 1652 (1392-1912)           | 11145 (10403-11887)                        | <0.001         | 10604 (9574-11634)                         | <0.001         |
| 9 Months                                                                                                                            | 13511 (12770-14253)                                               | 1970 (1692-2248)           | 11541 (10749-12333)                        | <0.001         | 10839 (9755-11922)                         | <0.001         |
| 12 Months                                                                                                                           | 13975 (13150-14799)                                               | 2406 (2096-2715)           | 11569 (10689-12450)                        | <0.001         | 10988 (9761-12214)                         | <0.001         |
| 15 Months                                                                                                                           | 14805 (13915-15695)                                               | 2768 (2429-3106)           | 12037 (11085-12989)                        | <0.001         | 11588 (10245-12931)                        | <0.001         |
| 18 Months                                                                                                                           | 15580 (14578-16581)                                               | 3188 (2807-3570)           | 12392 (11320-13463)                        | <0.001         | 11735 (10224-13247)                        | <0.001         |
| 21 Months                                                                                                                           | 15995 (14891-17100)                                               | 3503 (3084-3922)           | 12492 (11311-13673)                        | <0.001         | 11962 (10254-13669)                        | <0.001         |
| 24 Months                                                                                                                           | 16862 (15600-18123)                                               | 3893 (3413-4373)           | 12969 (11619-14318)                        | <0.001         | 11258 (9373-13143)                         | <0.001         |
| <i>Stress</i>                                                                                                                       |                                                                   |                            |                                            |                |                                            |                |
| 3 Months                                                                                                                            | 7316 (6817-7815)                                                  | 1541 (1343-1739)           | 5775 (5238-6311)                           | <0.001         | 6235 (5516-6953)                           | <0.001         |
| 6 Months                                                                                                                            | 8833 (8220-9447)                                                  | 2081 (1837-2325)           | 6752 (6091-7412)                           | <0.001         | 7034 (6211-7857)                           | <0.001         |
| 9 Months                                                                                                                            | 9495 (8825-10164)                                                 | 2379 (2114-2644)           | 7116 (6396-7836)                           | <0.001         | 7199 (6314-8084)                           | <0.001         |
| 12 Months                                                                                                                           | 10210 (9471-10949)                                                | 2684 (2393-2976)           | 7526 (6731-8320)                           | <0.001         | 7604 (6587-8620)                           | <0.001         |
| 15 Months                                                                                                                           | 10469 (9666-11272)                                                | 2972 (2655-3289)           | 7497 (6634-8360)                           | <0.001         | 7641 (6571-8711)                           | <0.001         |
| 18 Months                                                                                                                           | 11568 (10588-12547)                                               | 3420 (3027-3812)           | 8148 (7093-9203)                           | <0.001         | 8395 (7195-9595)                           | <0.001         |
| 21 Months                                                                                                                           | 11712 (10620-12803)                                               | 3838 (3400-4276)           | 7874 (6697-9050)                           | <0.001         | 8810 (7417-10202)                          | <0.001         |
| 24 Months                                                                                                                           | 12597 (11340-13854)                                               | 4199 (3693-4704)           | 8399 (7044-9753)                           | <0.001         | 9150 (7571-10729)                          | <0.001         |
| <b>Inconclusive vs. Conclusive Negative</b>                                                                                         |                                                                   |                            |                                            |                |                                            |                |
| <i>CTA</i>                                                                                                                          |                                                                   |                            |                                            |                |                                            |                |
| 3 Months                                                                                                                            | 4372 (3569-5175)                                                  | 1175 (957-1393)            | 3197 (2365-4029)                           | <0.001         | 2902 (1888-3916)                           | <0.001         |

| <b>Table VII: Association between Inconclusive Test Results from Initial NIT and Total Medical Costs for Overall Stress and CTA</b>                                                                                                                                                                                                                                     |                                                                   |                            |                                            |                |                                           |                |
|-------------------------------------------------------------------------------------------------------------------------------------------------------------------------------------------------------------------------------------------------------------------------------------------------------------------------------------------------------------------------|-------------------------------------------------------------------|----------------------------|--------------------------------------------|----------------|-------------------------------------------|----------------|
| <b>Time from Randomization</b>                                                                                                                                                                                                                                                                                                                                          | <b>Total Medical Costs (\$, Cumulative)<br/>LS Means (95% CI)</b> |                            | <b>Unadjusted Difference in Costs (\$)</b> |                | <b>Adjusted Difference in Costs (\$)*</b> |                |
|                                                                                                                                                                                                                                                                                                                                                                         | <b>Comparison Group</b>                                           | <b>Conclusive Negative</b> | <b>Difference (95% CI)</b>                 | <b>P-value</b> | <b>Difference (95% CI)</b>                | <b>P-value</b> |
| 6 Months                                                                                                                                                                                                                                                                                                                                                                | 5885 (4923-6846)                                                  | 1652 (1392-1912)           | 4233 (3237-5229)                           | <0.001         | 4198 (2912-5484)                          | <0.001         |
| 9 Months                                                                                                                                                                                                                                                                                                                                                                | 6827 (5802-7853)                                                  | 1970 (1692-2248)           | 4857 (3794-5920)                           | <0.001         | 4375 (3025-5724)                          | <0.001         |
| 12 Months                                                                                                                                                                                                                                                                                                                                                               | 7368 (6233-8503)                                                  | 2406 (2096-2715)           | 4962 (3786-6139)                           | <0.001         | 4234 (2714-5754)                          | <0.001         |
| 15 Months                                                                                                                                                                                                                                                                                                                                                               | 7438 (6189-8687)                                                  | 2768 (2429-3106)           | 4671 (3376-5965)                           | <0.001         | 4147 (2453-5841)                          | <0.001         |
| 18 Months                                                                                                                                                                                                                                                                                                                                                               | 7987 (6559-9415)                                                  | 3188 (2807-3570)           | 4799 (3321-6277)                           | <0.001         | 4155 (2190-6119)                          | <0.001         |
| 21 Months                                                                                                                                                                                                                                                                                                                                                               | 8738 (7148-10327)                                                 | 3503 (3084-3922)           | 5235 (3591-6878)                           | <0.001         | 4356 (2164-6548)                          | <0.001         |
| 24 Months                                                                                                                                                                                                                                                                                                                                                               | 9335 (7562-11108)                                                 | 3893 (3413-4373)           | 5442 (3605-7279)                           | <0.001         | 4030 (1656-6404)                          | <0.001         |
| <i>Stress</i>                                                                                                                                                                                                                                                                                                                                                           |                                                                   |                            |                                            |                |                                           |                |
| 3 Months                                                                                                                                                                                                                                                                                                                                                                | 2004 (1438-2569)                                                  | 1541 (1343-1739)           | 462 (-137-1061)                            | 0.130          | 447 (-332-1226)                           | 0.260          |
| 6 Months                                                                                                                                                                                                                                                                                                                                                                | 2679 (1982-3375)                                                  | 2081 (1837-2325)           | 597 (-140-1335)                            | 0.113          | 497 (-400-1393)                           | 0.278          |
| 9 Months                                                                                                                                                                                                                                                                                                                                                                | 2944 (2176-3712)                                                  | 2379 (2114-2644)           | 566 (-247-1378)                            | 0.172          | 484 (-499-1467)                           | 0.334          |
| 12 Months                                                                                                                                                                                                                                                                                                                                                               | 3538 (2693-4382)                                                  | 2684 (2393-2976)           | 853 (-40-1746)                             | 0.061          | 676 (-447-1799)                           | 0.238          |
| 15 Months                                                                                                                                                                                                                                                                                                                                                               | 4242 (3330-5155)                                                  | 2972 (2655-3289)           | 1271 (305-2236)                            | 0.010          | 1447 (275-2619)                           | 0.016          |
| 18 Months                                                                                                                                                                                                                                                                                                                                                               | 4627 (3515-5739)                                                  | 3420 (3027-3812)           | 1207 (28-2386)                             | 0.045          | 1860 (543-3177)                           | 0.006          |
| 21 Months                                                                                                                                                                                                                                                                                                                                                               | 5406 (4160-6652)                                                  | 3838 (3400-4276)           | 1568 (248-2889)                            | 0.020          | 2592 (1079-4105)                          | <0.001         |
| 24 Months                                                                                                                                                                                                                                                                                                                                                               | 5789 (4334-7244)                                                  | 4199 (3693-4704)           | 1591 (50-3131)                             | 0.043          | 2905 (1197-4614)                          | <0.001         |
| NIT = noninvasive test, CTA = computed tomographic angiogram                                                                                                                                                                                                                                                                                                            |                                                                   |                            |                                            |                |                                           |                |
| * Adjustment based on single repeated measures multivariate model. Adjustment variables include age, sex, race, ethnicity, body mass index, hypertension, diabetes, dyslipidemia, smoking (ever), depression, participate in physical activity, family history of CAD, peripheral arterial disease or cerebrovascular disease, and site characterization of chest pain. |                                                                   |                            |                                            |                |                                           |                |

| <b>Table VIII: Secondary Process of Care by Test Type Among Inconclusive Test Results</b>                                |                  |
|--------------------------------------------------------------------------------------------------------------------------|------------------|
| <b>Secondary Process of Care</b>                                                                                         | <b>Frequency</b> |
| <b>Exercise ECG</b>                                                                                                      |                  |
| Nothing                                                                                                                  | 82 (76.6%)       |
| 2nd NIT                                                                                                                  | 24 (22.4%)       |
| Functional                                                                                                               | 22 (91.7%)       |
| CTA                                                                                                                      | 2 (8.3%)         |
| ICA                                                                                                                      | 1 (0.9%)         |
| <b>Stress Echocardiography</b>                                                                                           |                  |
| Nothing                                                                                                                  | 101 (84.9%)      |
| 2nd NIT                                                                                                                  | 15 (12.6%)       |
| Functional                                                                                                               | 9 (60.0%)        |
| CTA                                                                                                                      | 6 (40.0%)        |
| ICA                                                                                                                      | 3 (2.5%)         |
| <b>Stress Nuclear</b>                                                                                                    |                  |
| Nothing                                                                                                                  | 177 (82.3%)      |
| 2nd NIT                                                                                                                  | 26 (12.1%)       |
| Functional                                                                                                               | 13 (50.0%)       |
| CTA                                                                                                                      | 13 (50.0%)       |
| ICA                                                                                                                      | 12 (5.6%)        |
| <b>CTA</b>                                                                                                               |                  |
| Nothing                                                                                                                  | 139 (46.5%)      |
| 2nd NIT                                                                                                                  | 109 (36.5%)      |
| Functional                                                                                                               | 94 (86.2%)       |
| CTA                                                                                                                      | 15 (13.8%)       |
| ICA                                                                                                                      | 51 (17.1%)       |
| ECG = electrocardiogram, NIT = noninvasive test, CTA = computed tomographic angiogram, ICA = invasive coronary angiogram |                  |

**SUPPLEMENTAL FIGURE LEGENDS**

**Figure I** – CONSORT Diagram

**Figure II** – Definition of Test Conclusiveness for Exercise ECG Test. ETT = exercise treadmill test; ECG = electrocardiogram.

**Figure III** – Definition of Test Conclusiveness for Exercise Echocardiography Test

**Figure IV** – Definition of Test Conclusiveness for Exercise Nuclear Test. GI = gastrointestinal.

**Figure V** – Definition of Test Conclusiveness for Pharmacologic Echocardiography Test

**Figure VI** – Definition of Test Conclusiveness for Pharmacologic Nuclear Test

**Figure VII** – Definition of Test Conclusiveness for Computed Tomographic Angiography (CTA) Test

**Figure VIII** – Frequency of inconclusiveness by stress test type versus CTA with adjusted odds ratio and 95% CI. CTA = computed tomographic angiogram, ECG = electrocardiogram, Echo = echocardiogram.

**Figure IX** – Frequency of Inconclusiveness Within Stress Test Type of Exercise Electrocardiogram (ECG) Against Stress Echocardiogram (Echo) and Stress Nuclear With Adjusted Odds Ratio and 95% CI

Figure I

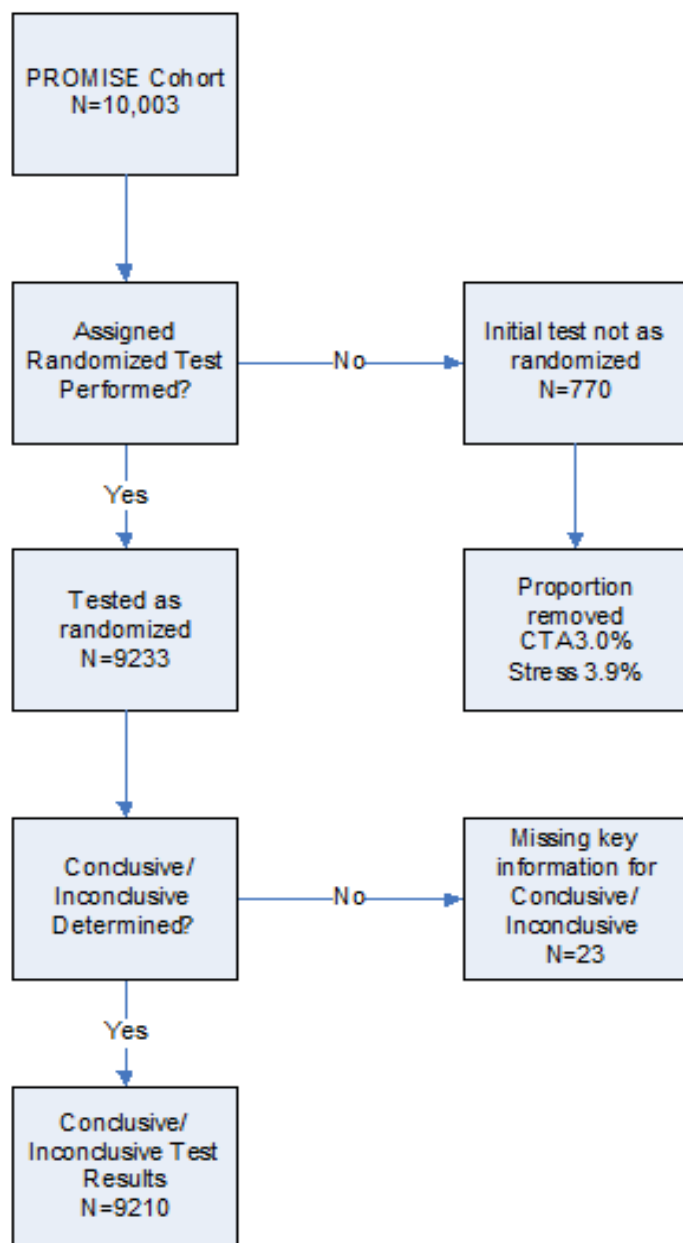

Figure II

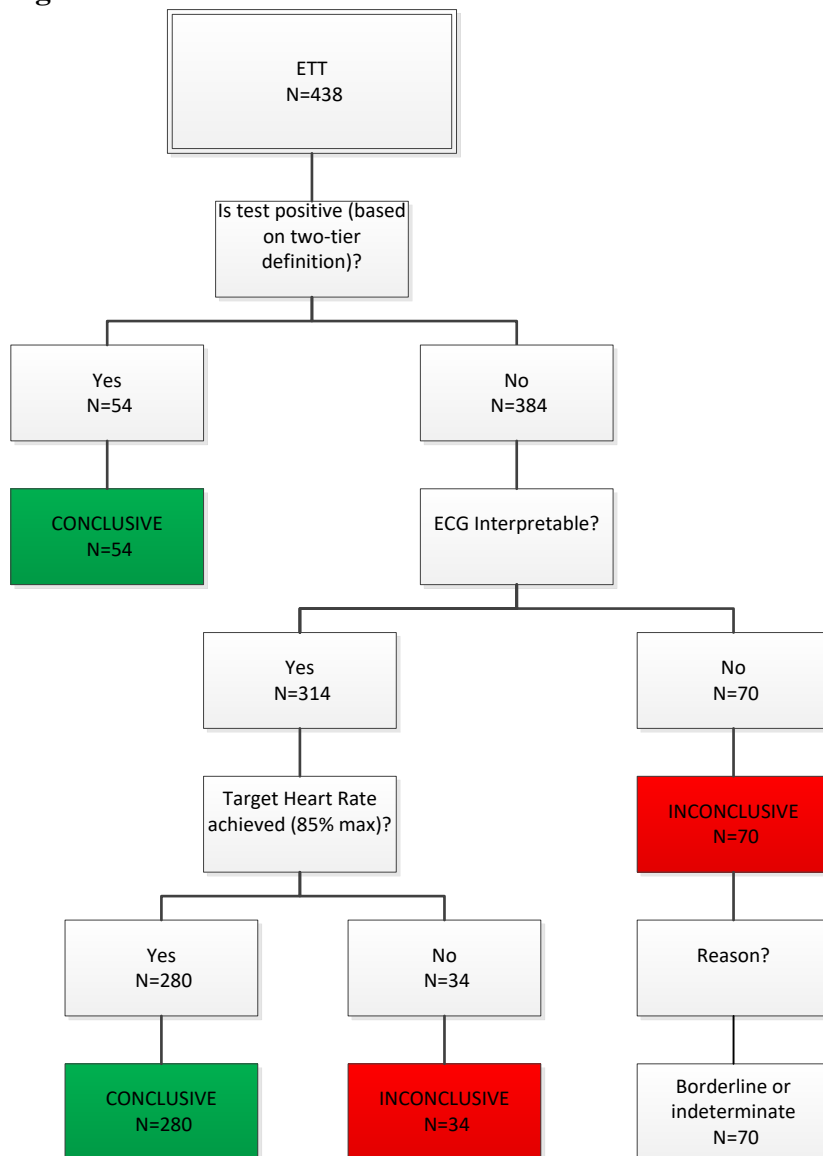

Figure III

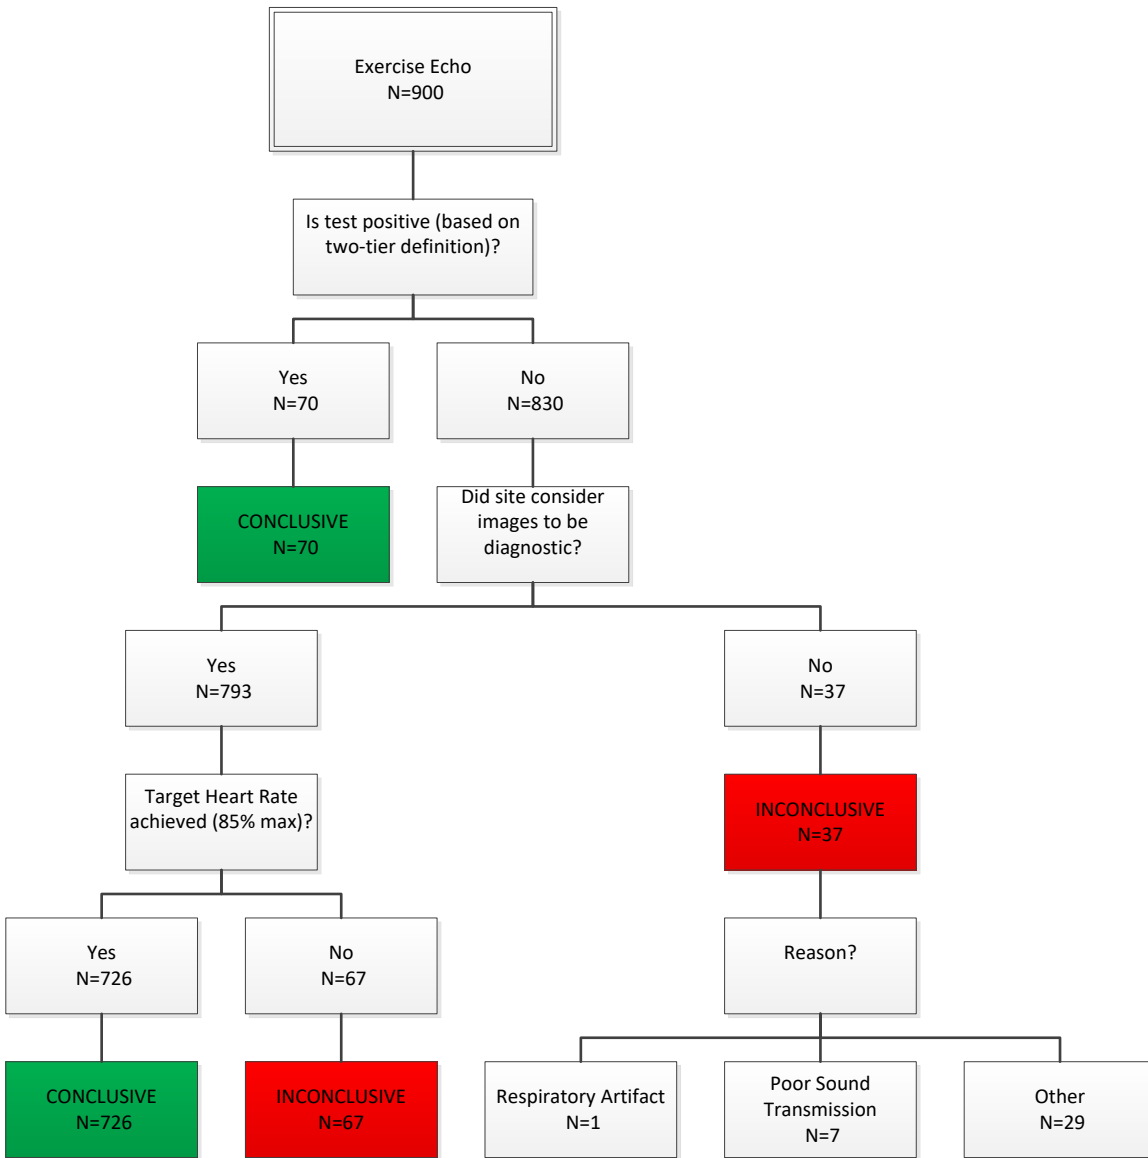

Figure IV

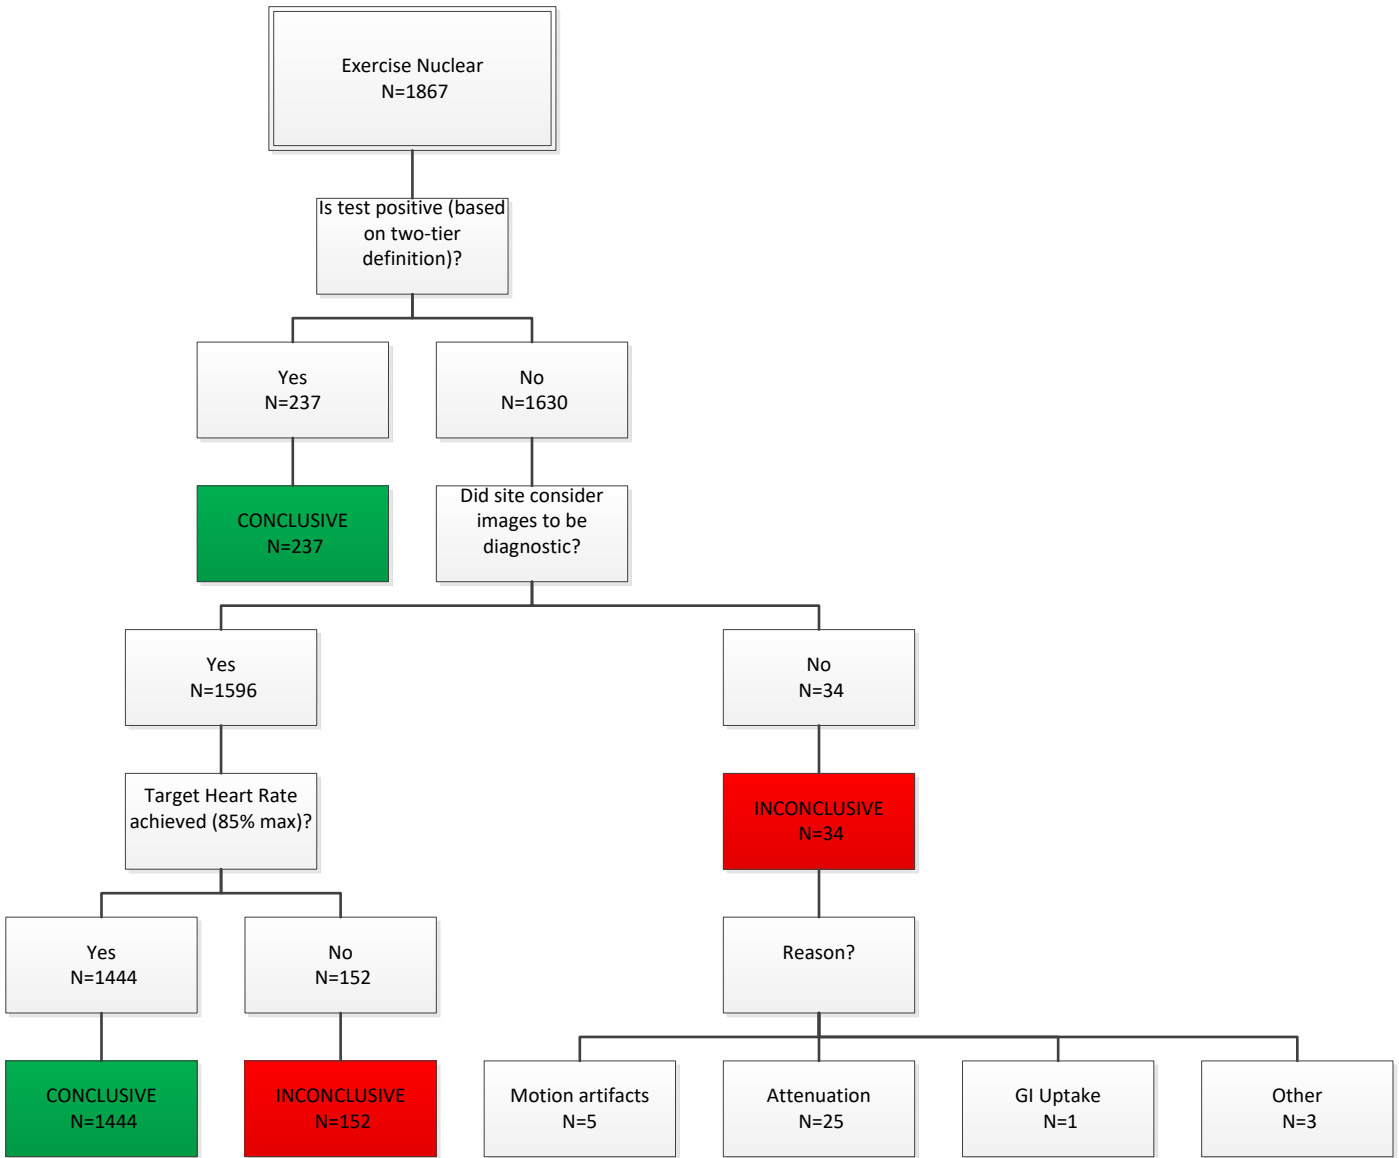



Figure V

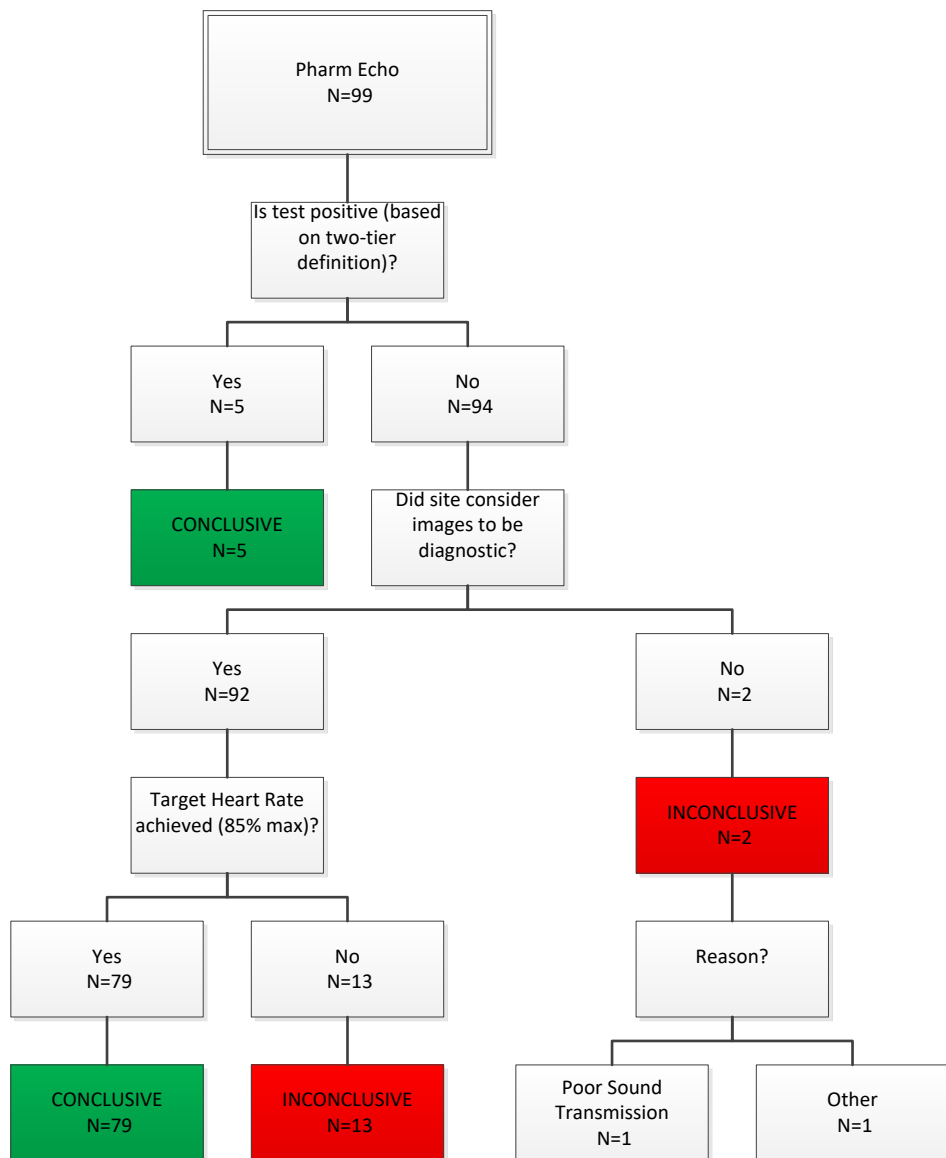

Figure VI

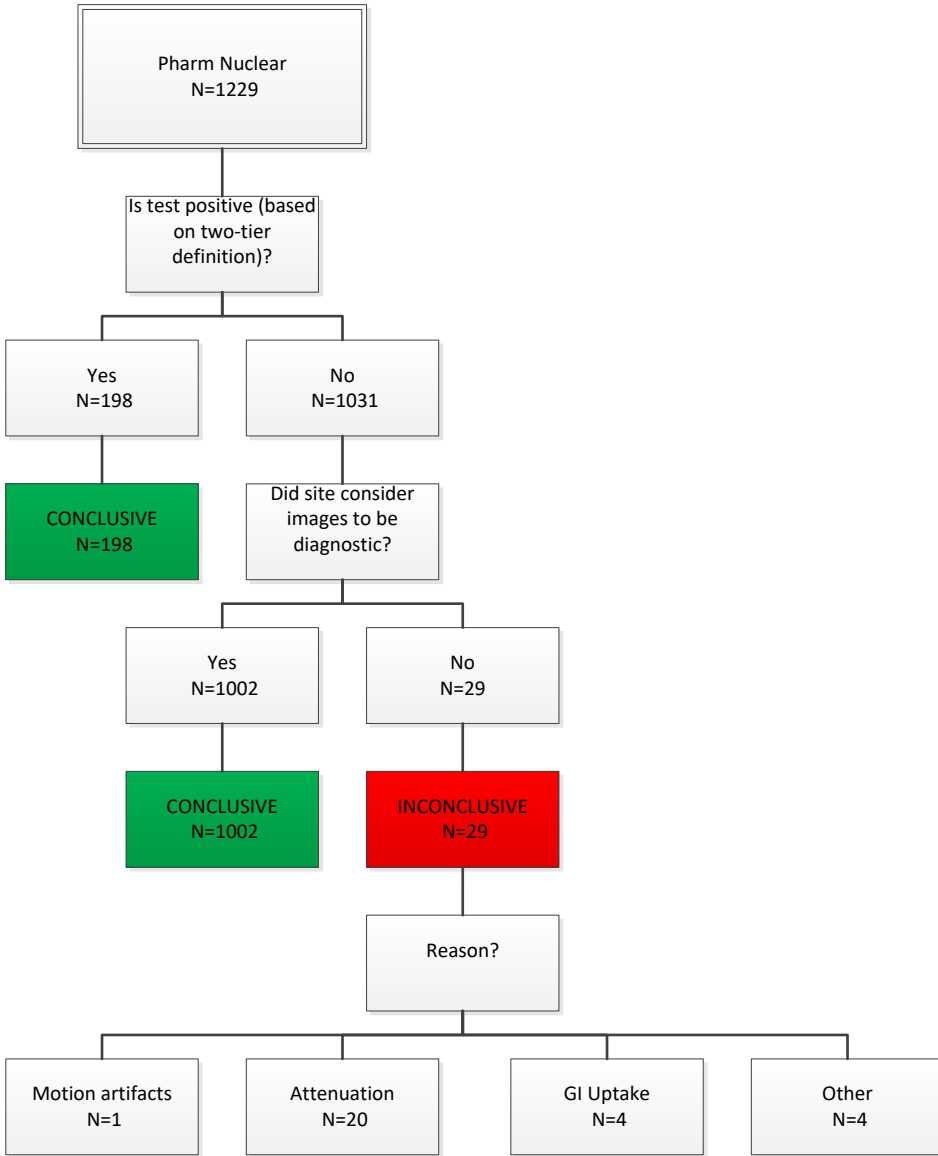

Figure VII

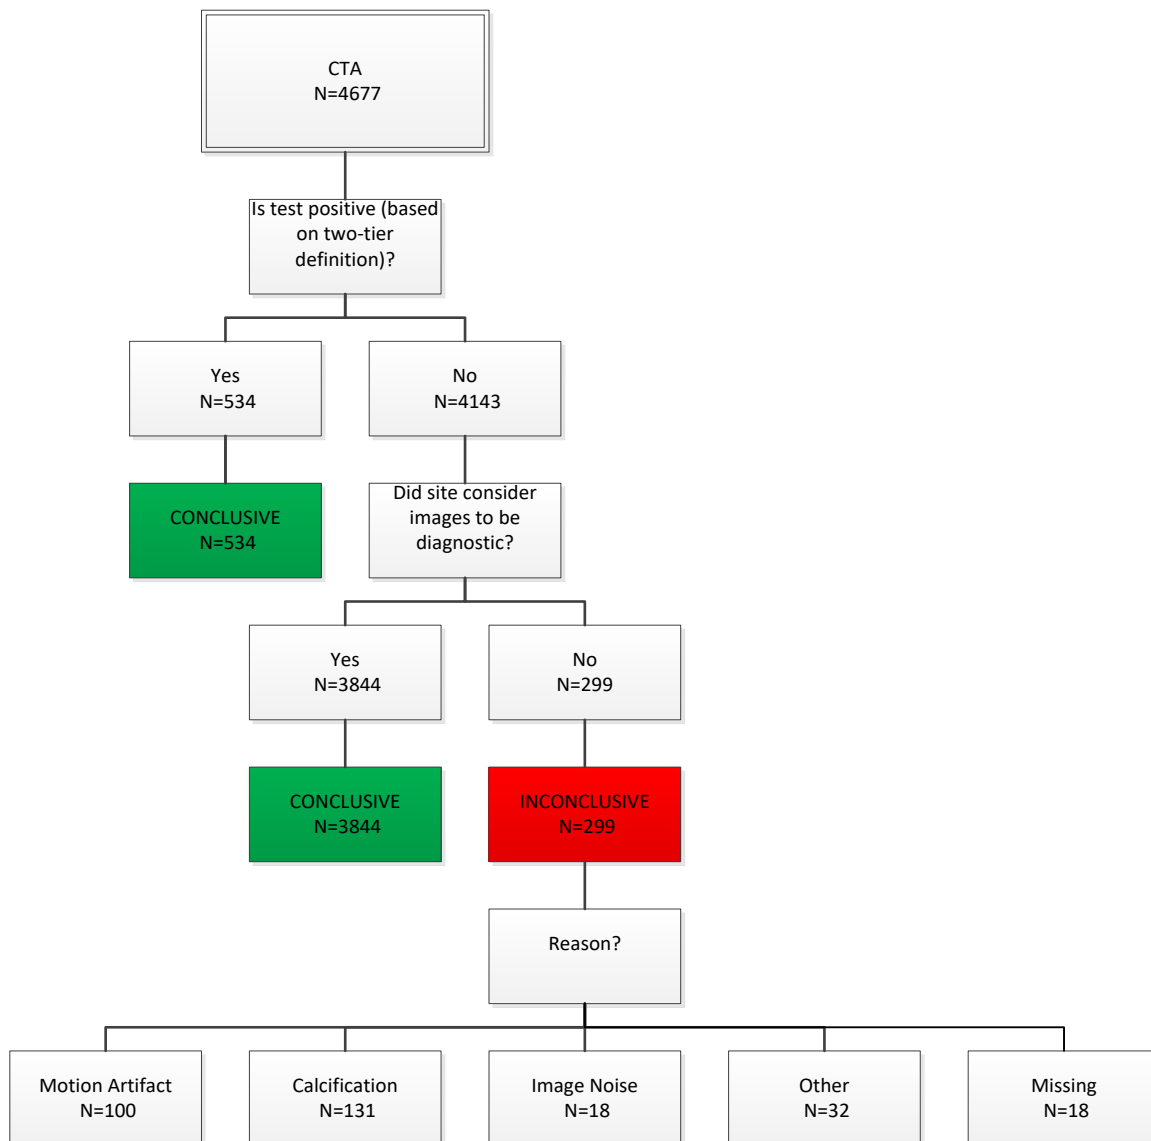

Supplement: NIHMS1576135-supplement-Supplemental_Material.pdf [file NIHMS1576135-supplement-Supplemental_Material.pdf]
